# Supplementary material for: The long-circulating effect of pegylated nanoparticles revisited via simultaneous monitoring of both the drug payloads and nanocarriers
Source: PubMed Central journal article supplement — Acta Pharm Sin B. 2021 Nov 18;12(5):2479–93. doi: 10.1016/j.apsb.2021.11.016 (PMC9136618; doi:10.1016/j.apsb.2021.11.016), 2021-11-18
Supplement: mmc1.pdf [file mmc1.pdf]

## Supporting Information for

### ORIGINAL ARTICLE

## The long-circulating effect of pegylated nanoparticles revisited *via* simultaneous monitoring of both the drug payloads and nanocarriers

Wufa Fan<sup>a</sup>, Haixia Peng<sup>a</sup>, Zhou Yu<sup>a</sup>, Luting Wang<sup>a</sup>, Haisheng He<sup>a</sup>, Yuhua Ma<sup>a,d</sup>, Jianping Qi<sup>a,c</sup>, Yi Lu<sup>a,c</sup>, Wei Wu<sup>a,b,c,\*</sup>

<sup>a</sup>*Key Laboratory of Smart Drug Delivery of MOE, School of Pharmacy, Fudan University, Shanghai 201203, China*

<sup>b</sup>*Center for Medical Research and Innovation, Shanghai Pudong Hospital, Fudan University Pudong Medical Center, Shanghai 201399, China*

<sup>c</sup>*Shanghai Skin Disease Hospital, Tongji University School of Medicine, Shanghai 200443, China*

<sup>d</sup>*Key Laboratory for Tibet Plateau Phytochemistry of Qinghai Province, School of Pharmacy, Qinghai Nationalities University, Xining 810007, China*

Received 25 August 2021; Received in revised form 19 October 2021; accepted 25 October 2021

\*Corresponding author. Tel./fax: +86 21 51980084.

E-mail address: wuwei@shmu.edu.cn (Wei Wu).

**Table S1** Within-day precision of determination of mPEG-PCL nanoparticles ( $n = 3$ ).

| Organ  | C<br>(mg/mL) | Within-day precision (%) |                           |                            |                            |                               |                             |
|--------|--------------|--------------------------|---------------------------|----------------------------|----------------------------|-------------------------------|-----------------------------|
|        |              | PCL-80                   | mPEG <sub>5k</sub> -9%-80 | mPEG <sub>5k</sub> -17%-80 | mPEG <sub>5k</sub> -29%-80 | mPEG <sub>2k</sub> -29%-80 nm | mPEG <sub>5k</sub> -29%-200 |
| Heart  | 0.0048       | 8.33                     | 6.55                      | 8.33                       | 8.18                       | 9.12                          | 8.81                        |
|        | 0.078        | 2.92                     | 0.51                      | 2.69                       | 3.90                       | 6.37                          | 3.32                        |
|        | 2.5          | 1.89                     | 2.59                      | 3.54                       | 4.43                       | 8.89                          | 5.03                        |
| Liver  | 0.0048       | 8.81                     | 5.88                      | 7.90                       | 4.88                       | 6.55                          | 6.45                        |
|        | 0.078        | 2.18                     | 4.72                      | 1.63                       | 5.80                       | 1.08                          | 2.67                        |
|        | 2.5          | 3.39                     | 3.45                      | 3.90                       | 6.74                       | 5.81                          | 1.86                        |
| Spleen | 0.0048       | 7.51                     | 8.33                      | 9.12                       | 7.16                       | 6.74                          | 4.68                        |
|        | 0.078        | 3.38                     | 1.19                      | 4.45                       | 9.08                       | 1.72                          | 4.34                        |
|        | 2.5          | 2.02                     | 2.41                      | 6.94                       | 4.35                       | 5.87                          | 3.50                        |
| Lung   | 0.0048       | 7.53                     | 9.62                      | 4.88                       | 9.17                       | 2.28                          | 3.85                        |
|        | 0.078        | 3.28                     | 2.91                      | 3.10                       | 3.87                       | 3.63                          | 2.79                        |
|        | 2.5          | 3.37                     | 2.84                      | 2.39                       | 7.26                       | 5.53                          | 1.57                        |
| Kidney | 0.0048       | 7.51                     | 9.17                      | 7.51                       | 8.18                       | 8.65                          | 7.05                        |
|        | 0.078        | 8.14                     | 2.82                      | 8.10                       | 4.01                       | 1.47                          | 1.89                        |
|        | 2.5          | 2.32                     | 4.32                      | 7.67                       | 4.27                       | 3.96                          | 5.23                        |
| Blood  | 0.0048       | 9.35                     | 8.92                      | 9.96                       | 7.90                       | 4.17                          | 5.09                        |
|        | 0.078        | 6.49                     | 3.43                      | 5.39                       | 9.12                       | 6.09                          | 3.27                        |
|        | 2.5          | 2.81                     | 4.34                      | 5.60                       | 4.24                       | 6.61                          | 4.24                        |

**Table S2** Between-day precision of determination of mPEG-PCL nanoparticles ( $n = 3$ ).

| Organ  | $C$<br>(mg/mL) | Between-day precision (%) |                           |                            |                            |                            |                                |
|--------|----------------|---------------------------|---------------------------|----------------------------|----------------------------|----------------------------|--------------------------------|
|        |                | PCL-80                    | mPEG <sub>5k</sub> -9%-80 | mPEG <sub>5k</sub> -17%-80 | mPEG <sub>5k</sub> -29%-80 | mPEG <sub>2k</sub> -29%-80 | mPEG <sub>5k</sub> -29%-200 nm |
| Heart  | 0.0048         | 8.81                      | 4.88                      | 7.90                       | 7.51                       | 5.68                       | 5.88                           |
|        | 0.078          | 5.98                      | 5.00                      | 3.41                       | 5.09                       | 2.99                       | 2.23                           |
|        | 2.5            | 2.46                      | 1.99                      | 1.59                       | 6.24                       | 7.73                       | 6.55                           |
| Liver  | 0.0048         | 9.17                      | 3.94                      | 8.25                       | 4.17                       | 6.28                       | 2.59                           |
|        | 0.078          | 4.36                      | 4.72                      | 5.30                       | 3.17                       | 5.01                       | 6.51                           |
|        | 2.5            | 5.08                      | 7.29                      | 5.64                       | 4.16                       | 3.57                       | 6.74                           |
| Spleen | 0.0048         | 5.87                      | 5.41                      | 7.51                       | 5.33                       | 5.33                       | 4.35                           |
|        | 0.078          | 8.25                      | 7.19                      | 3.24                       | 3.22                       | 7.14                       | 6.68                           |
|        | 2.5            | 2.47                      | 2.41                      | 5.96                       | 3.86                       | 4.95                       | 4.93                           |
| Lung   | 0.0048         | 4.75                      | 9.17                      | 4.68                       | 6.67                       | 6.55                       | 4.00                           |
|        | 0.078          | 4.30                      | 3.88                      | 1.88                       | 1.92                       | 4.57                       | 3.61                           |
|        | 2.5            | 2.20                      | 5.97                      | 8.92                       | 5.82                       | 5.80                       | 5.05                           |
| Kidney | 0.0048         | 7.90                      | 5.26                      | 7.90                       | 5.56                       | 8.33                       | 4.55                           |
|        | 0.078          | 6.20                      | 3.66                      | 1.84                       | 1.25                       | 1.11                       | 5.19                           |
|        | 2.5            | 1.23                      | 4.86                      | 3.99                       | 5.33                       | 7.41                       | 5.99                           |
| Blood  | 0.0048         | 5.99                      | 6.19                      | 6.67                       | 8.66                       | 6.55                       | 4.55                           |
|        | 0.078          | 2.48                      | 1.60                      | 0.93                       | 5.96                       | 6.46                       | 9.93                           |
|        | 2.5            | 1.76                      | 5.02                      | 7.59                       | 5.29                       | 7.90                       | 0.36                           |

**Table S3** Accuracy of determination of mPEG-PCL nanoparticles. Data are presented as mean±SD (*n*=3).

| Organ  | C<br>(mg/mL) | Accuracy (%) |                                  |                                   |                                   |                                   |                                 |
|--------|--------------|--------------|----------------------------------|-----------------------------------|-----------------------------------|-----------------------------------|---------------------------------|
|        |              | PCL-80 nm    | mPEG <sub>5k</sub> -<br>9%-80 nm | mPEG <sub>5k</sub> -<br>17%-80 nm | mPEG <sub>5k</sub> -<br>29%-80 nm | mPEG <sub>2k</sub> -<br>29%-80 nm | mPEG <sub>5k</sub> -<br>29%-200 |
| Heart  | 0.0048       | 95.21±7.93   | 93.64±6.68                       | 98.20±6.30                        | 98.33±6.40                        | 96.71±3.15                        | 92.96±7.85                      |
|        | 0.078        | 95.24±2.46   | 93.98±4.44                       | 92.43±2.28                        | 95.81±2.60                        | 90.78±2.84                        | 91.11±3.55                      |
|        | 2.5          | 101.04±4.29  | 101.42±2.78                      | 98.46±2.73                        | 98.69±2.56                        | 96.59±3.11                        | 99.33±3.01                      |
| Liver  | 0.0048       | 103.63±9.56  | 91.47±7.94                       | 97.35±6.52                        | 98.64±3.60                        | 101.23±4.83                       | 99.94±6.46                      |
|        | 0.078        | 101.22±6.82  | 93.79±3.52                       | 94.08±2.11                        | 90.49±1.86                        | 94.26±1.56                        | 90.29±4.13                      |
|        | 2.5          | 99.68±6.96   | 100.92±3.94                      | 102.12±4.67                       | 97.14±3.33                        | 105.53±4.59                       | 97.25±2.15                      |
| Spleen | 0.0048       | 93.93±7.85   | 90.51±1.80                       | 94.03±7.29                        | 97.75±4.76                        | 97.00±4.80                        | 99.85±4.82                      |
|        | 0.078        | 90.16±3.23   | 90.75±2.99                       | 93.54±2.48                        | 90.72±3.70                        | 90.74±4.20                        | 92.02±1.14                      |
|        | 2.5          | 99.62±1.59   | 100.23±2.42                      | 101.59±7.23                       | 97.29±2.70                        | 98.90±3.54                        | 101.59±4.86                     |
| Lung   | 0.0048       | 94.65±8.47   | 92.97±6.30                       | 91.33±3.14                        | 94.29±4.90                        | 103.53±6.29                       | 99.39±3.14                      |
|        | 0.078        | 93.97±3.57   | 94.68±1.87                       | 92.37±2.43                        | 92.24±5.75                        | 92.94±3.47                        | 90.35±3.81                      |
|        | 2.5          | 99.07±5.63   | 98.91±1.26                       | 101.35±5.52                       | 94.56±7.60                        | 98.17±2.72                        | 97.33±2.72                      |
| Kidney | 0.0048       | 92.00±4.76   | 93.81±4.80                       | 91.86±7.24                        | 103.99±6.49                       | 96.17±4.79                        | 105.81±4.74                     |
|        | 0.078        | 91.42±4.61   | 91.77±3.48                       | 91.45±3.32                        | 91.74±4.48                        | 91.36±4.26                        | 90.99±2.54                      |
|        | 2.5          | 99.96±2.16   | 97.37±2.18                       | 102.69±1.84                       | 99.88±3.66                        | 99.79±5.05                        | 100.06±3.88                     |
| Blood  | 0.0048       | 90.29±6.56   | 93.20±7.86                       | 95.07±3.13                        | 93.28±4.83                        | 96.83±3.67                        | 102.78±3.14                     |
|        | 0.078        | 93.59±8.53   | 90.74±3.96                       | 91.32±4.06                        | 92.81±3.70                        | 94.53±2.72                        | 90.32±3.20                      |
|        | 2.5          | 101.79±1.21  | 96.69±4.91                       | 94.65±3.31                        | 105.53±3.95                       | 101.29±4.33                       | 100.44±2.72                     |

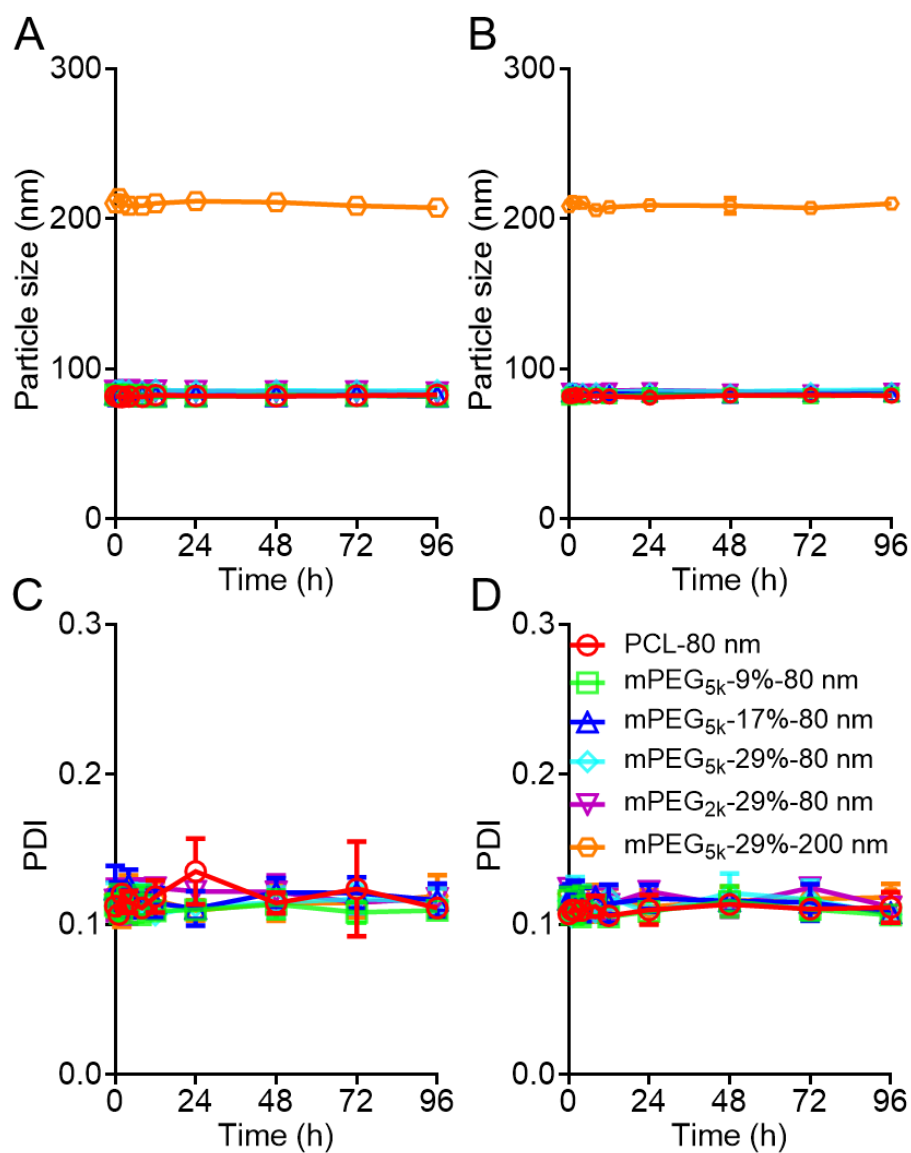

**Figure S1** Physical stability of mPEG-PCL nanoparticles incubated in different media: A-B, particle size (A, purified water; B, PBS, pH=7.4); C-D, PDI (C, purified water; D, PBS, pH = 7.4). Data are presented as mean  $\pm$  SD ( $n = 3$ ).

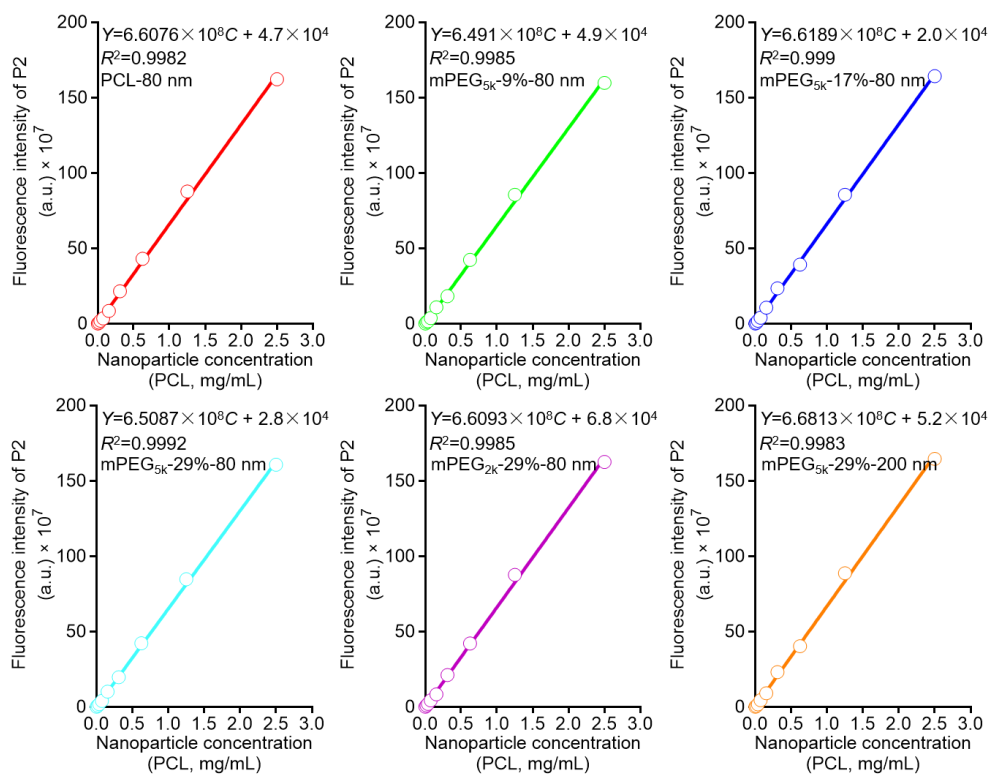

**Figure S2** Calibration curves of mPEG-PCL nanoparticles in the heart obtained by linear regression of fluorescence intensity of P2 probe loaded in nanoparticle by IVIS vs. nanoparticle concentration. The PCL content was utilized to represent the content of nanoparticles. The nanoparticle suspension was sequentially diluted by heart homogenate.

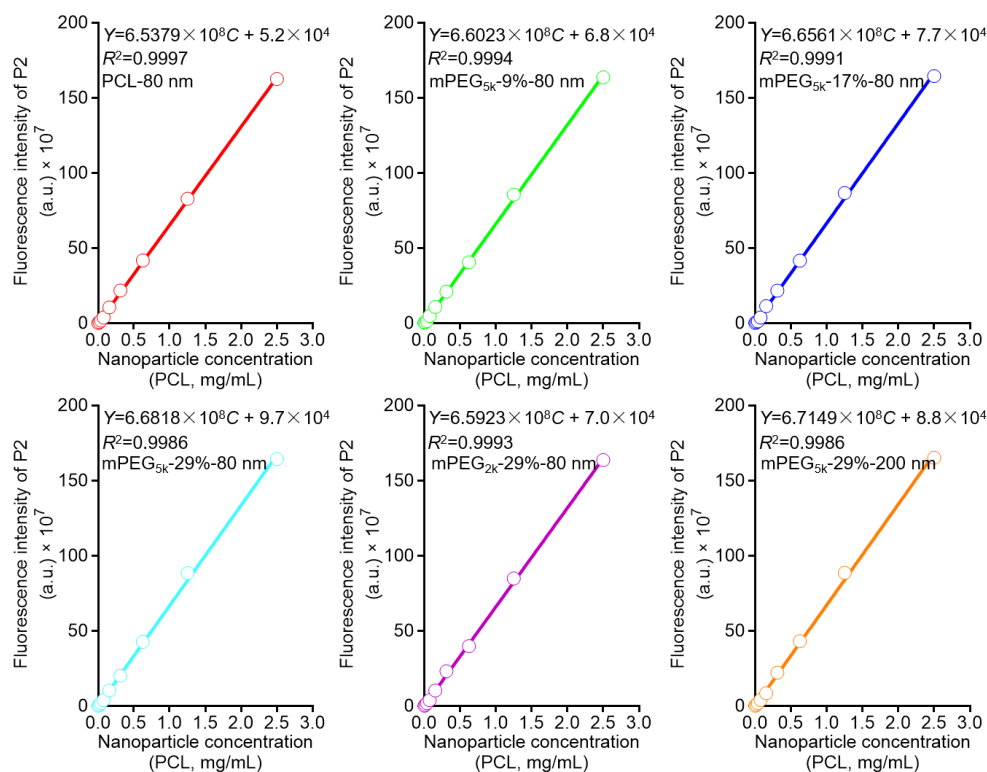

**Figure S3** Calibration curves of mPEG-PCL nanoparticles in the liver obtained by linear regression of fluorescence intensity of P2 probe loaded in nanoparticle by IVIS vs. nanoparticle concentration. The PCL content was utilized to represent the content of nanoparticles. The nanoparticle suspension was sequentially diluted by liver homogenate.

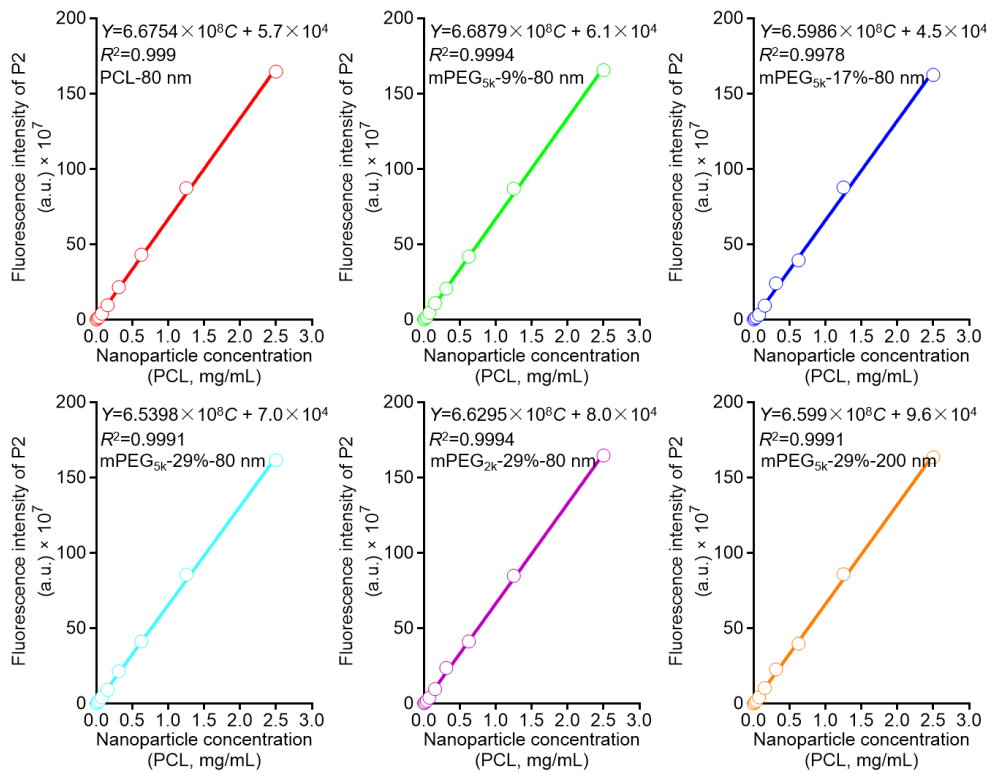

**Figure S4** Calibration curves of mPEG-PCL nanoparticles in the spleen obtained by linear regression of fluorescence intensity of P2 probe loaded in nanoparticle by IVIS vs. nanoparticle concentration. The PCL content was utilized to represent the content of nanoparticles. The nanoparticle suspension was sequentially diluted by spleen homogenate.



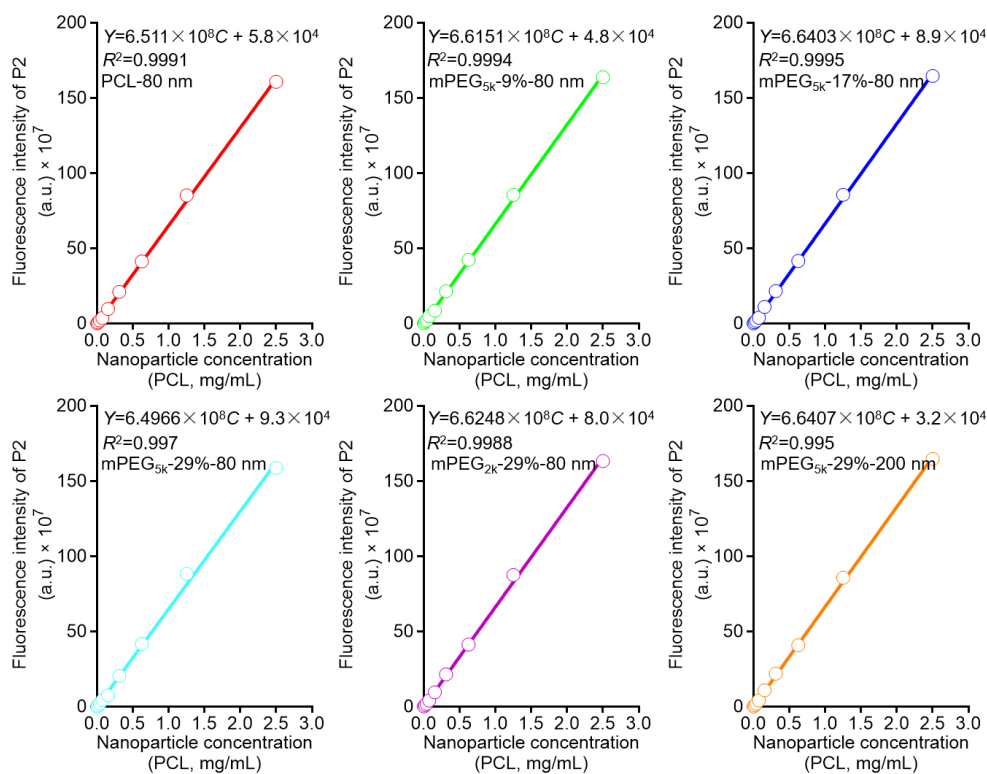

**Figure S5** Calibration curves of mPEG-PCL nanoparticles in the lungs obtained by linear regression of fluorescence intensity of P2 probe loaded in nanoparticle by IVIS vs. nanoparticle concentration. The PCL content was utilized to represent the content of nanoparticles. The nanoparticle suspension was sequentially diluted by lung homogenate.

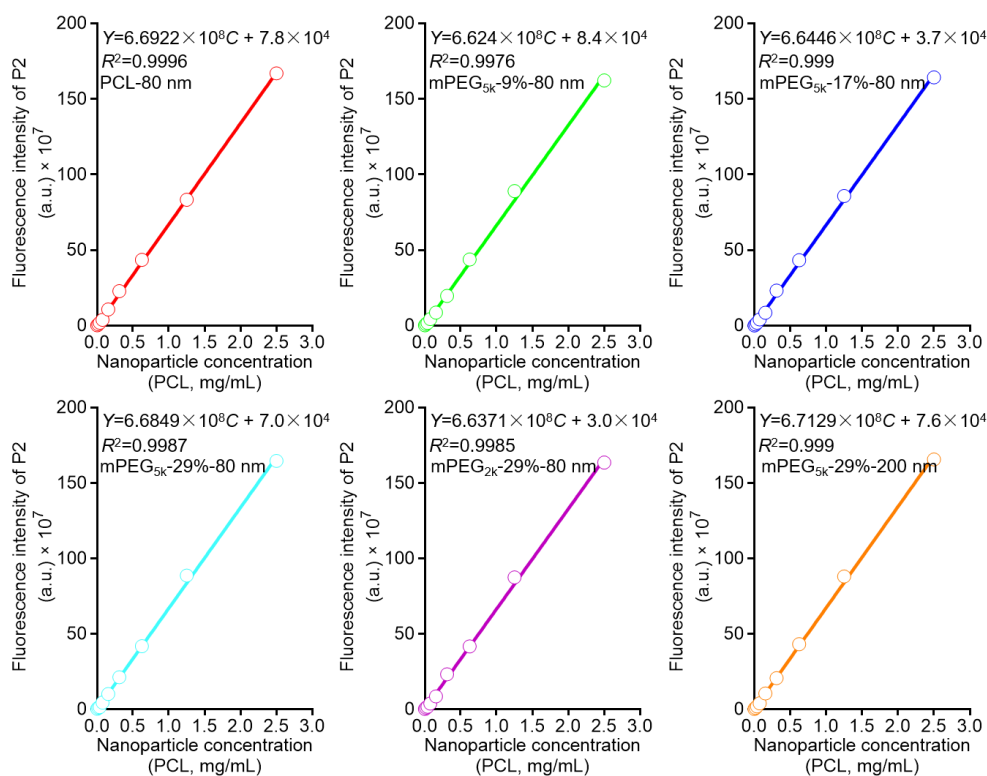

**Figure S6** Calibration curves of mPEG-PCL nanoparticles in the kidneys obtained by linear regression of fluorescence intensity of P2 probe loaded in nanoparticle by IVIS vs. nanoparticle concentration. The PCL content was utilized to represent the content of nanoparticles. The nanoparticle suspension was sequentially diluted by kidney homogenate.

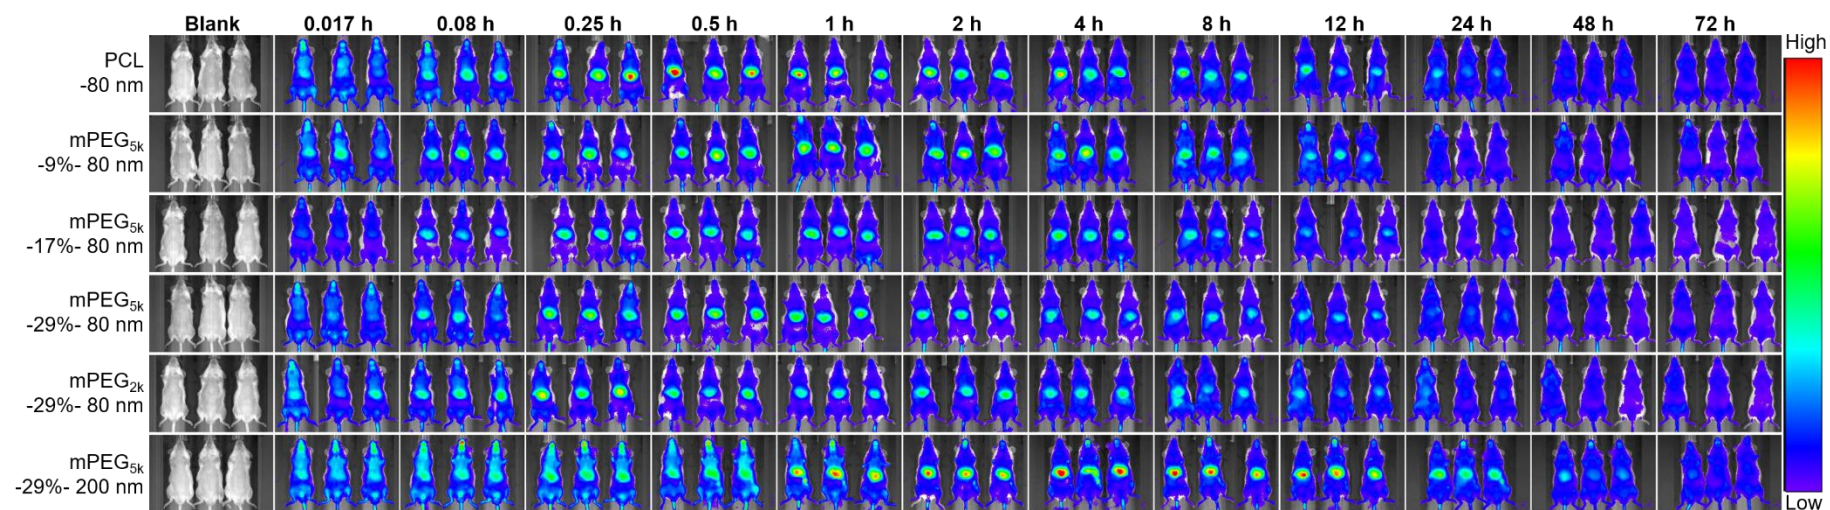

**Figure S7** Live imaging of the distribution of P2-loaded mPEG-PCL nanoparticles after intravenous administration.

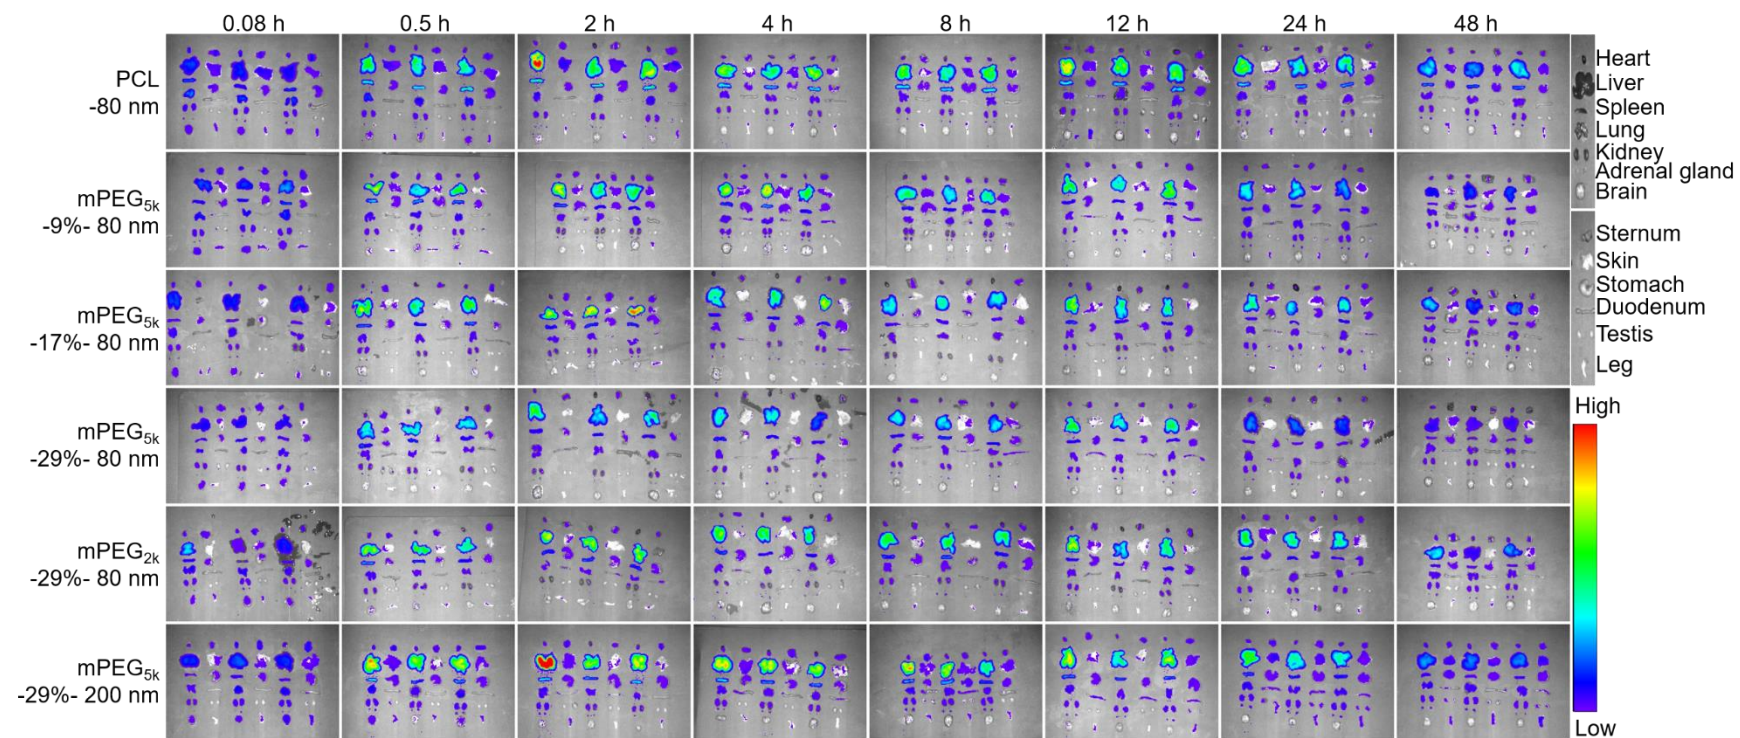

**Figure S8** Live imaging of *ex vivo* organs and tissues dissected after intravenous administration of P2-loaded mPEG-PCL nanoparticles.

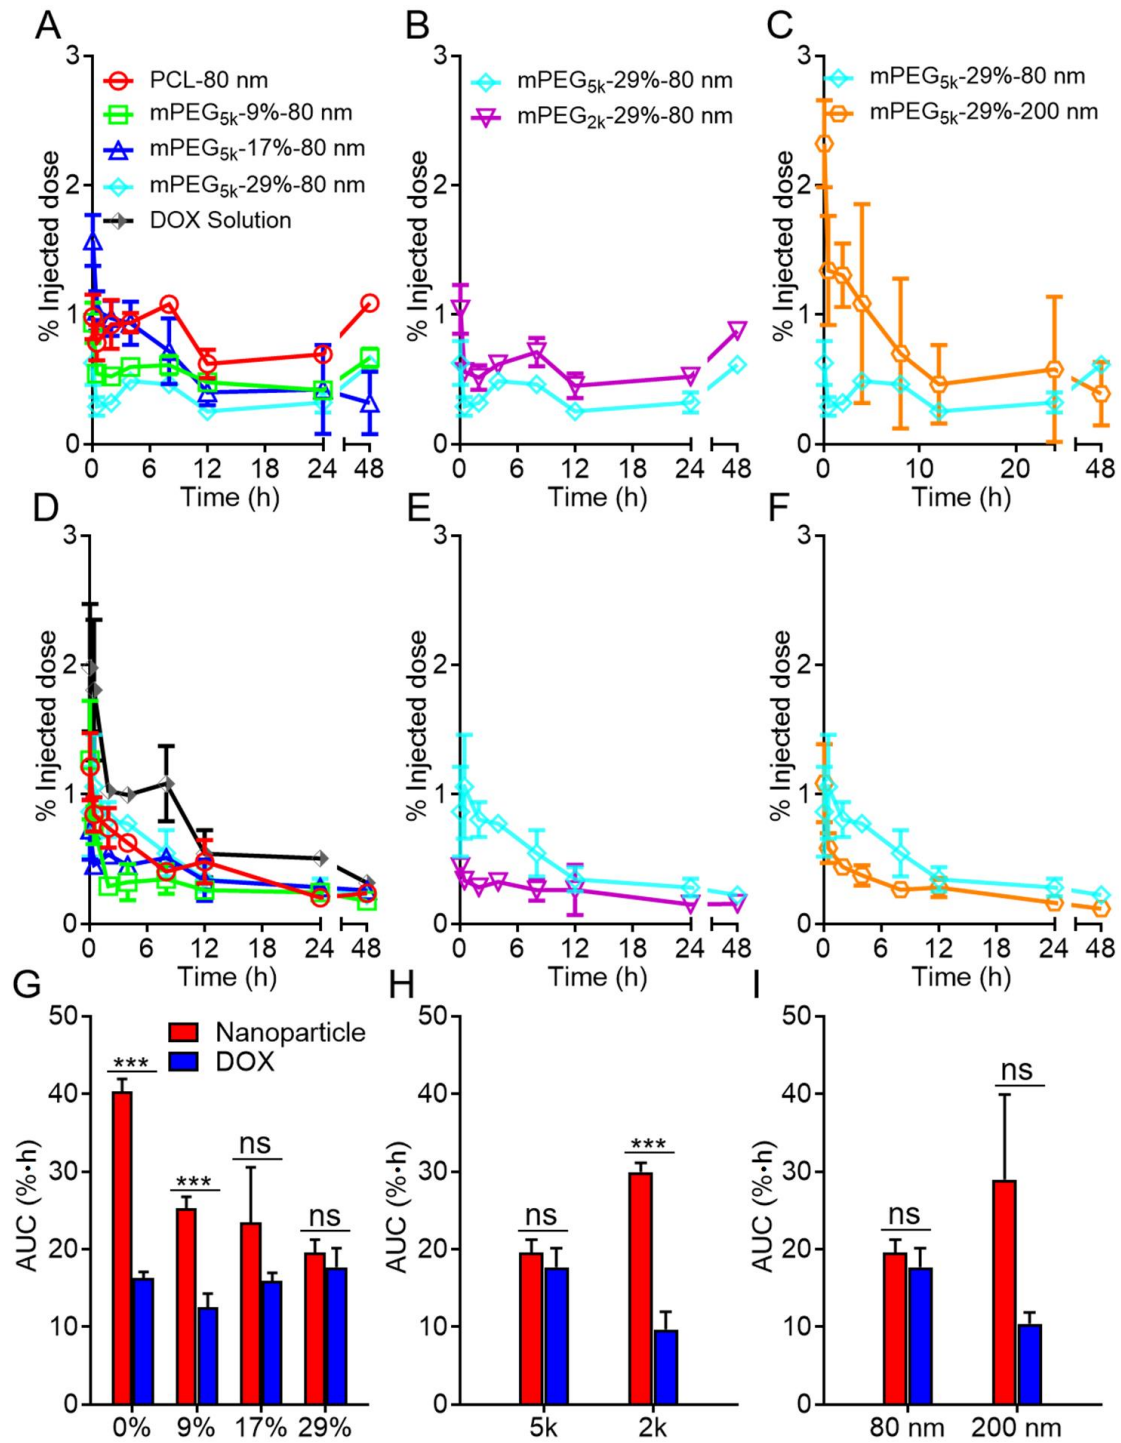

**Figure S9** Distribution content of nanoparticle (A-C) and DOX (D-F) encapsulated in mPEG-PCL nanoparticle in the heart as highlighted by comparing PEGylation density (A, D), PEG chain length (B, E) and particle size (C, F), respectively, while bar plot G, H & I present corresponding AUC values. Data are presented as mean  $\pm$  SD ( $n = 3$ ). \*\*\* $P < 0.001$ , ns, not significant.

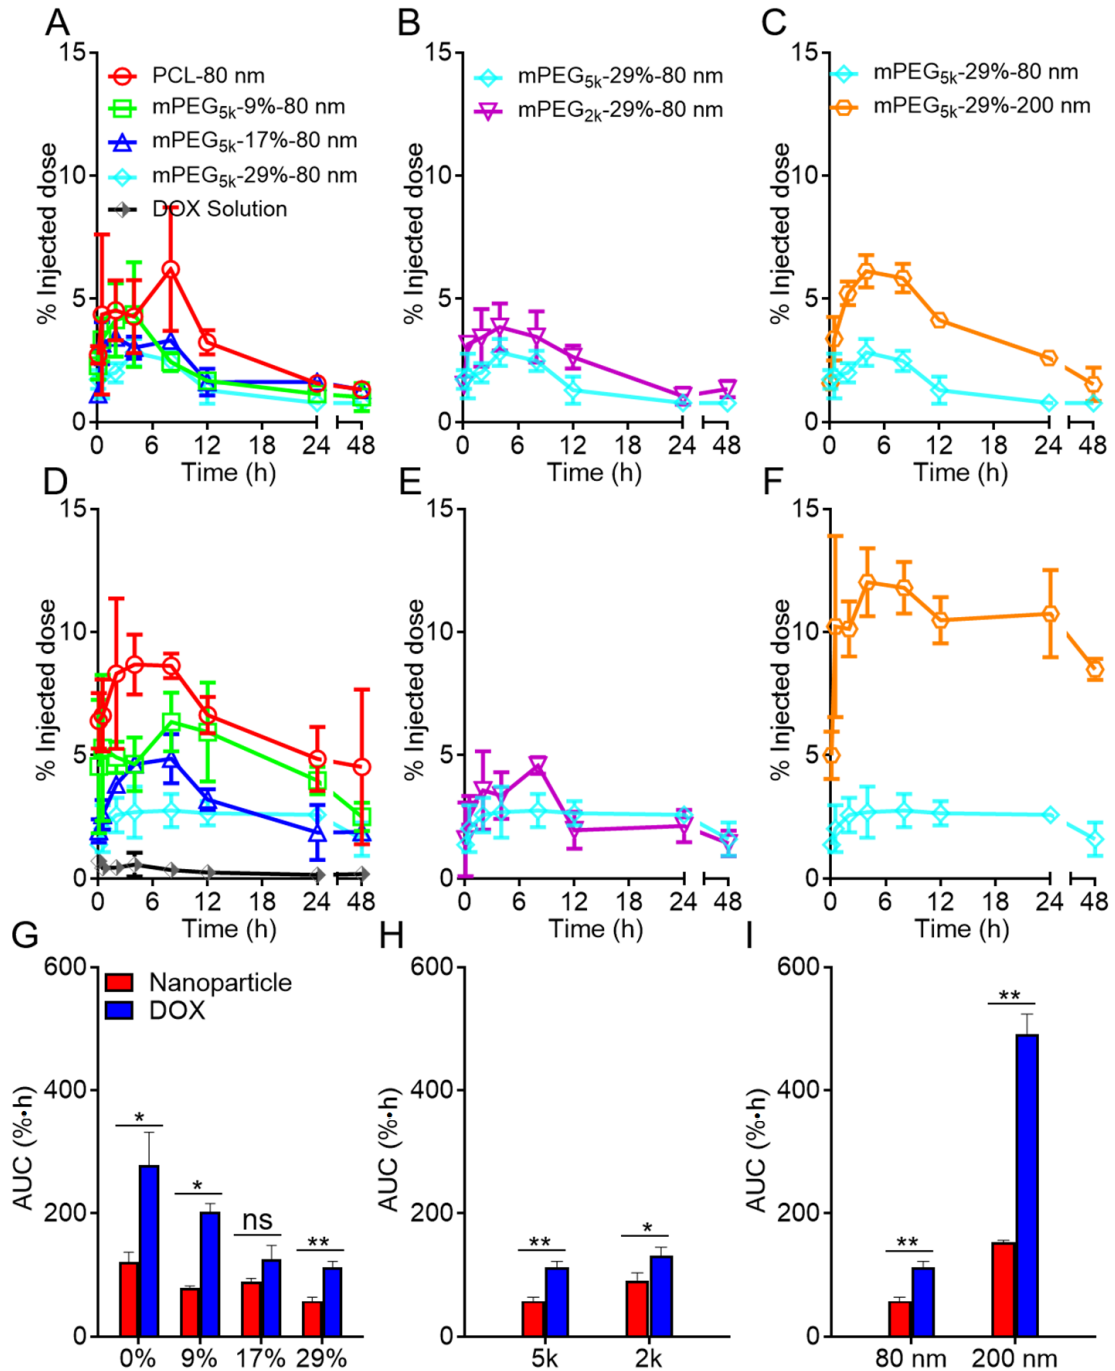

**Figure S10** Distribution content of nanoparticle (A-C) and DOX (D-F) encapsulated in mPEG-PCL nanoparticle in the spleen as highlighted by comparing PEGylation density (A, D), PEG chain length (B, E) and particle size (C, F), respectively, while bar plot G, H & I present corresponding AUC values. Data are presented as mean  $\pm$  SD ( $n = 3$ ). \* $P < 0.05$ . \*\* $P < 0.01$ . ns, not significant.

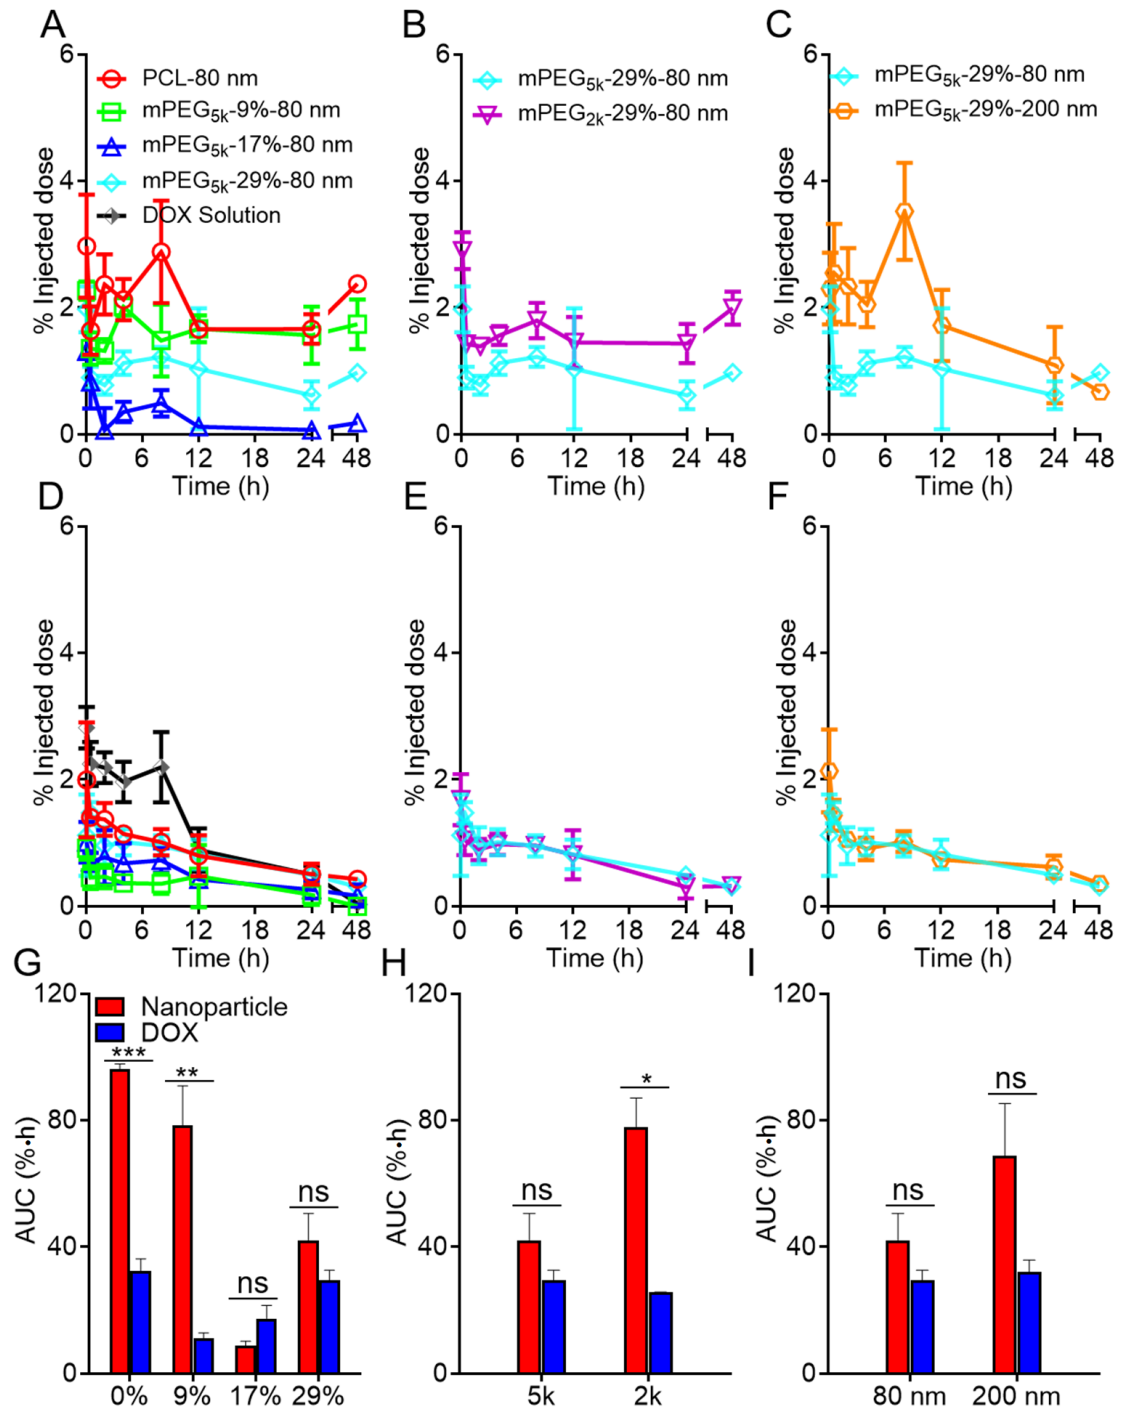

**Figure S11** Distribution content of nanoparticle (A-C) and DOX (D-F) encapsulated in mPEG-PCL nanoparticle in the lungs as highlighted by comparing PEGylation density (A, D), PEG chain length (B, E) and particle size (C, F), respectively, while bar plot G, H & I present corresponding AUC values. Data are presented as mean  $\pm$  SD ( $n = 3$ ). \* $P < 0.05$ , \*\* $P < 0.01$ . \*\*\* $P < 0.001$ . ns, not significant.

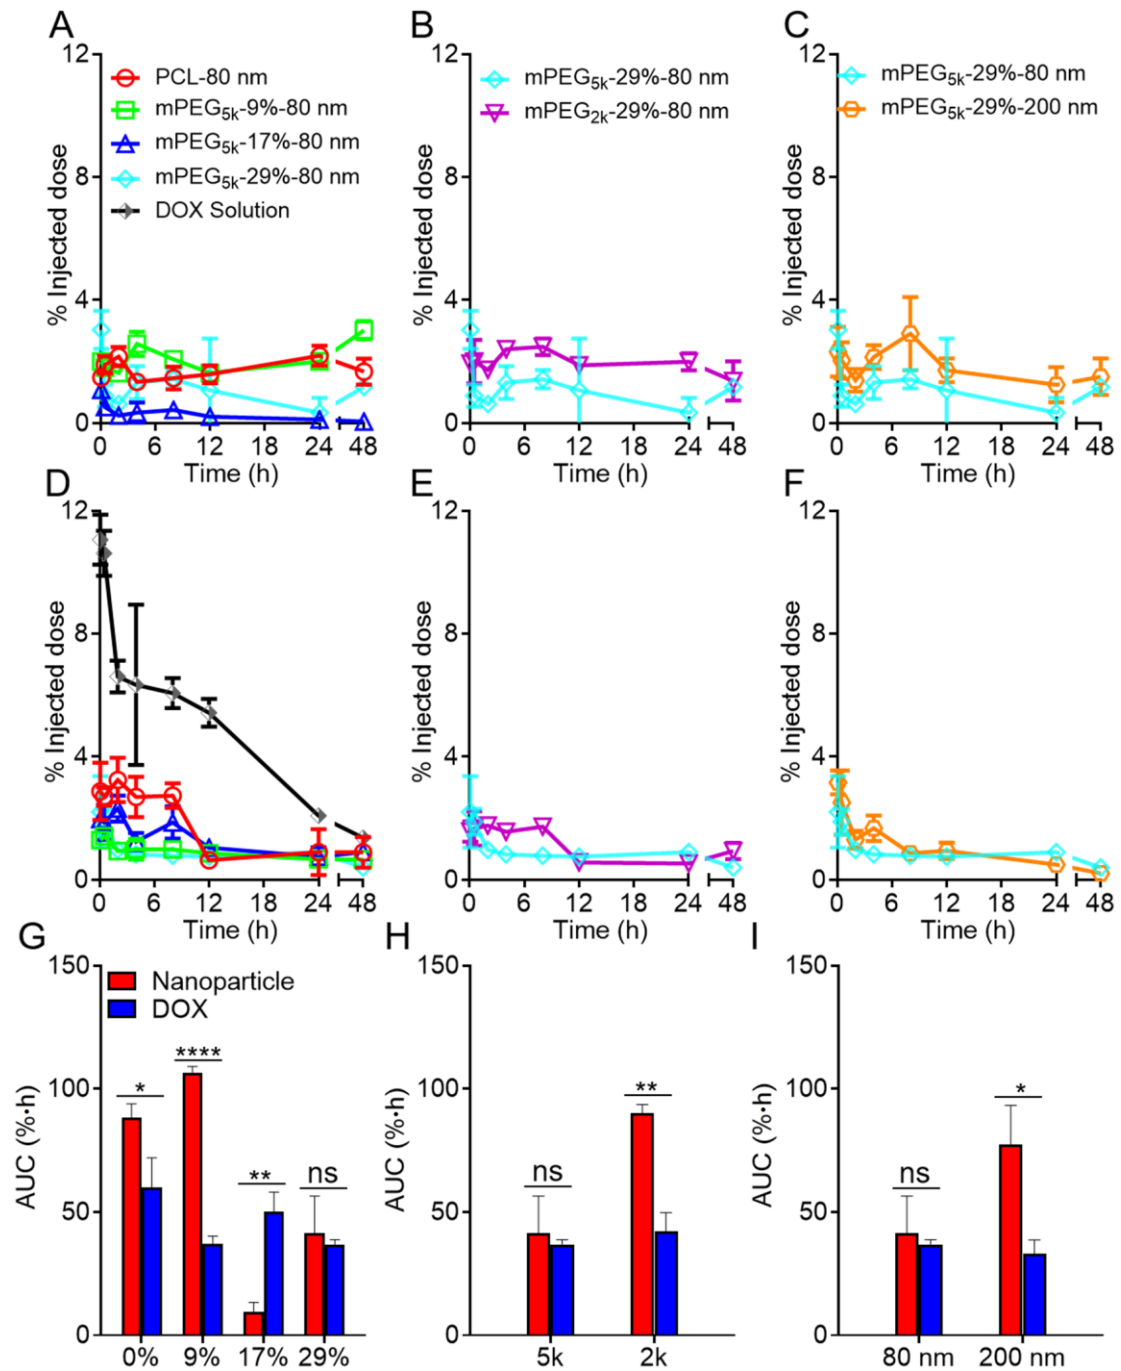

**Figure S12** Distribution content of nanoparticle (A-C) and DOX (D-F) encapsulated in mPEG-PCL nanoparticle in the kidneys as highlighted by comparing PEGylation density (A, D), PEG chain length (B, E) and particle size (C, F), respectively, while bar plot G, H & I present corresponding AUC values. Data are presented as mean  $\pm$  SD ( $n = 3$ ). \* $P < 0.05$ . \*\* $P < 0.01$ . \*\*\* $P < 0.001$ . \*\*\*\* $P < 0.0001$ . ns, not significant.
